# Supplementary material
Source: Springer Nature journal article supplement (https://www.springermedizin.de/resource/supplementary/12889_2012_6340_MOESM1_ESM.pdf/9499550)
Supplement: MOESM1 [file 9499550]

Men (n=3225)

Women (n=4475)

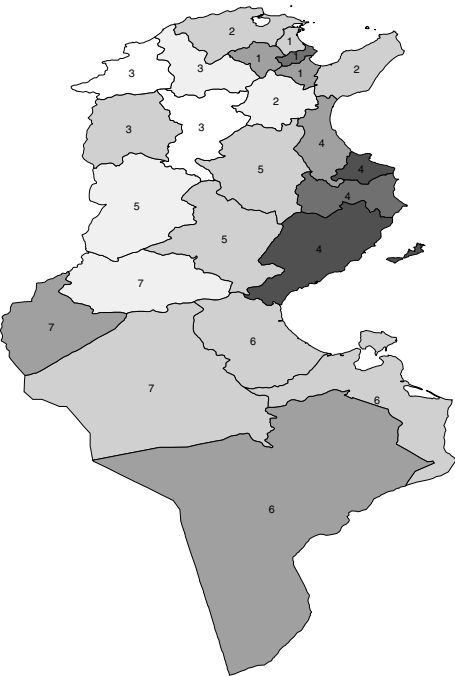

Tunisia

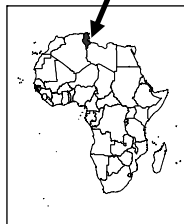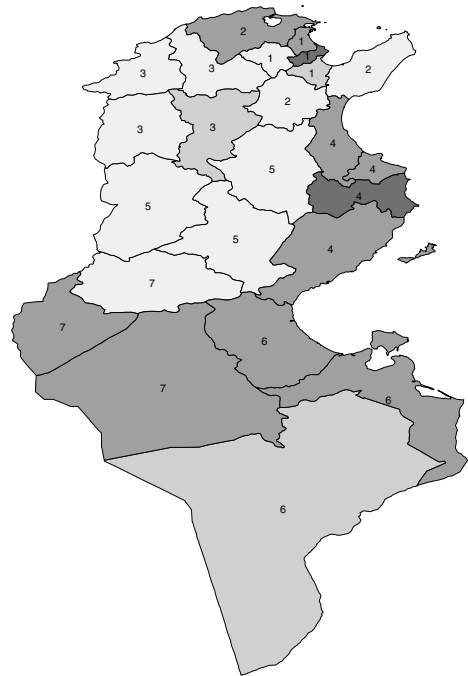

Prevalence of T2D

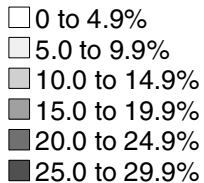

Region: 1 –Tunis, 2 -North-East, 3 -North-West, 4 -Centre-East, 5 -Centre-West, 6-South-East, 7-South-West
